# Supplementary material for: Low Molecular Weight Barley β-Glucan Affects Glucose and Lipid Metabolism by Prebiotic Effects
Source: PubMed Central journal article supplement (PMC7823751; doi:10.3390/nu13010130), 2020-12-31
Supplement: nutrients-13-00130-s001.pdf [file nutrients-13-00130-s001.pdf]

Supplementary Table S1. Group-specific primers for real time PCR

|                                     |         | primer sequence        | Standard bacteria                | Strain No. |
|-------------------------------------|---------|------------------------|----------------------------------|------------|
| <i>Bacteroides fragilis</i> group   | Forward | GTCAGTTGTGAAAGTTTGC    | <i>Bacteroides fragilis</i>      | JCM11019   |
|                                     | Reverse | CAATCGGAGTTCTTCGTG     |                                  |            |
| <i>Prevotella</i>                   | Forward | CACCAAGGCGACGATCA      | <i>Prevotella melaninogenica</i> | JCM6325    |
|                                     | Reverse | GGATAACGCCYGGACCT      |                                  |            |
| <i>Bifidobacterium</i>              | Forward | AGGGTTCGATTCTGGCTCAG   | <i>Bifidobacterium longum</i>    | JCM1217    |
|                                     | Reverse | CATCCGGCATTACCACCC     |                                  |            |
| <i>Lactobacillus</i>                | Forward | TGGAAACAGGTGCTAATACCG  | <i>Lactobacillus rhamnosus</i>   | ATCC8530   |
|                                     | Reverse | GTCCATTGTGGAAGATTCCC   |                                  |            |
| <i>Clostridium coccooides</i> group | Forward | AAATGACGGTACCTGACTAA   | <i>Clostridium coccooides</i>    | JCM1395T   |
|                                     | Reverse | CTTTGAGTTTCATTCTTGCGAA |                                  |            |
| <i>Clostridium leptum</i> subgroup  | Forward | GCACAAGCAGTGGAGT       | <i>Ruminococcus albus</i>        | JCM14654   |
|                                     | Reverse | CTTCCTCCGTTTTGTCAA     |                                  |            |
| <i>Atopobium</i> cluster            | Forward | GGGTTGAGAGACCGACC      | <i>Collinsella aerofaciens</i>   | JCM10188   |
|                                     | Reverse | CGGRGCTTCTTCTGCAGG     |                                  |            |

Supplementary Table S2. Primers used in the real-time reverse transcription polymerase chain reaction (PCR).

|                                 | Forward                          | Reverse                            |
|---------------------------------|----------------------------------|------------------------------------|
| <i>Hepatic Lipid metabolism</i> |                                  |                                    |
| PPAR $\alpha$                   | 5'-AGGAAGCCGTTCTGTGACAT-3'       | 5'-AATCCCCTCCTGCAACTTCT-3'         |
| LXR                             | 5'-CCTTCCTCAAGGACTTCAGTTACAA-3'  | 5'-CATGGCTCTGGAGAACTCAAAGAT-3'     |
| SREBP1c                         | 5'-GGACTAAGTGCCCTCAACCT-3'       | 5'-GCCACATAGATCTCTGCCAGTGT-3'      |
| FAS                             | 5'-CCTGGATAGCATTCCGAACCT-3'      | 5'-AGCACATCTCGAAGGCTACACA-3'       |
| ACC                             | 5'-GGATGACAGGCTTGCAGCTATG-3'     | 5'-GGAACGTAAGTCGCCGGATG-3'         |
| G6PD                            | 5'-CTGGAACCGCATCATCGTGGAG-3'     | 5'-CCTGATGATCCCAAATTCATCAAAATAG-3' |
| SCD1                            | 5'-CCTTATCATTGCCAACACCAT-3'      | 5'-AGCCAACCCACGTGAGAGAA-3'         |
| CD36 (FAT)                      | 5'-TCCCTCTCTGGAGTTCTTGG-3'       | 5'-TTGCAGCTGAGCAGAAAGAG-3'         |
| PK                              | 5'-TGCAATTGGAGCCGTGGA-3'         | 5'-TGGCTGTCATTCAAG-3'              |
| DGAT1                           | 5'-GCTGAGTCTGTACCTACTTTTGG-3'    | 5'-AGGCTTGTAGAAGTGTCTGATGCA-3'     |
| CPT1                            | 5'-GATGGAGAGGATGTTCAACACTACAC-3' | 5'-AGCCCTCATAGAGCCAGACCTT-3'       |
| ACOX                            | 5'-CAGCGTTACGAGGTGGCTGTTA-3'     | 5'-TGCCCAAGTGAAGGTCCAAAG-3'        |
| HMG-CoA reductase               | 5'-CCAAGGTGGTGAGAGAGGTGTT-3'     | 5'-CGTCAACCATAGCTTCCGTAGTT-3'      |
| <i>Ileal L cell function</i>    |                                  |                                    |
| NeuroD                          | 5'-CTTGGCCAAGAACTACATCTGG-3'     | 5'-CGTGTGTTGAAAGAGAAGTTGCC-3'      |
| NGN3                            | 5'-AAGAGCGAGTTGGCACTCAGC-3'      | 5'-AAGCTGTGGTCCGCTATGCG-3'         |
| PPAR $\beta/\delta$             | 5'-ACTTGGCGTGGCGCCTGC-3'         | 5'-AGCGGTGTGGGTATGCGCA-3'          |
| PGCG                            | 5'-ATTGCCAAACGTCATGATGA-3'       | 5'-GGCGACTTCTTCTGGGAAGT-3'         |
| PC1/3                           | 5'-AGACAGCATTACACCATCTCTA-3'     | 5'-AGAACAATTCTCTGCATACCAAGGT-3'    |
| GPBAR1                          | 5'-AACGCTACATGGCAGTGTTG-3'       | 5'-GGAGGCCATAAACTTCCAGGTAGA-3'     |
| GPR43                           | 5'-GGGATCTGGGTACATGCTTAT-3'      | 5'-ATGTCAGACAGACGGGTACCAA-3'       |
| <i>Reference</i>                |                                  |                                    |
| 36B4                            | 5'-GGCCCTGCACTCTCGCTTTC-3'       | 5'-TGCCAGGACGCGCTTGT-3'            |

---

R =A or G

PPAR $\alpha$ , peroxisome proliferator-activated receptor $\alpha$ ; LXR, liver X receptor; SREBP-1c, sterol regulatory element-binding transcription factor-1c; FAS, fatty acid synthase; ACC, acetyl-CoA carboxylase; G6PD, glucose 6-phosphate dehydrogenase; SCD1, stearoyl coenzyme A desaturase 1; CD36 (FAT), fatty acid translocase; PK, pyruvate kinase; DGAT1, diacyl glycerol acyl-transferase 1; CPT1, carnitine palmitoyl transferase 1; ACOX, acyl-coenzyme A oxidase; 3-hydroxy-3-methyl-glutaryl-CoA reductase, (HMG-CoA reductase); NeuroD, neurogenic differentiation factor; NGN3, neurogenin 3; PPAR $\beta/\delta$ , peroxisome proliferator-activated receptor $\beta/\delta$ ; PGCG, proglucagon; PC1/3, prohormone convertases1/3; GPBAR1, G-protein-coupled bile acid receptor 1; GPR43, G-protein-coupled receptor 43; 36B4, acidic ribosomal protein.

Supplementary Table S3. Bacterial counts of major genus microbiota in the cecal digesta of mice fed the test diets

| Log CFU/g cecum                     | Control        | LMW-BG         | HMW-BG         |
|-------------------------------------|----------------|----------------|----------------|
| <i>Lactobacillus</i>                | 9.3 $\pm$ 0.2  | 10.0 $\pm$ 0.2 | 9.7 $\pm$ 0.2  |
| <i>Prevotella</i>                   | 6.5 $\pm$ 0.2  | 6.2 $\pm$ 0.1  | 6.1 $\pm$ 0.1  |
| <i>Clostridium coccooides</i> group | 9.1 $\pm$ 0.1  | 9.2 $\pm$ 0.1  | 9.2 $\pm$ 0.1  |
| <i>Clostridium leptum</i> subgroup  | 10.8 $\pm$ 0.1 | 11.0 $\pm$ 0.1 | 11.0 $\pm$ 0.1 |
| <i>Atopobium</i> cluster            | 9.1 $\pm$ 0.2  | 9.7 $\pm$ 0.2  | 9.3 $\pm$ 0.2  |

Values are means $\pm$ SE, n=8.

Supplementary Table S4. Liver lipid accumulation

|                           | Control   | LMW-BG    | HMW-BG    |
|---------------------------|-----------|-----------|-----------|
| Cholesterol (mmol/liver)  | 0.37±0.02 | 0.35±0.01 | 0.33±0.01 |
| (mmol/g liver)            | 0.34±0.01 | 0.34±0.01 | 0.36±0.02 |
| Triglyceride (mmol/liver) | 2.18±0.21 | 2.44±0.18 | 2.08±0.27 |
| (mmol/g liver)            | 1.98±0.16 | 2.38±0.19 | 2.22±0.24 |

Values are means±SE, n=8.

Supplementary Table S5. Spearman's rank correlation coefficient related to the prebiotic effect

|             | Ileum |        | Liver    |      |       |        |               | Serum             |                 |         |        |
|-------------|-------|--------|----------|------|-------|--------|---------------|-------------------|-----------------|---------|--------|
|             | NGN3  | GPBAR1 | SREBP-1c | FAS  | CD36  | LXR    | PPAR $\alpha$ | Total cholesterol | LDL-cholesterol | Glucose | Leptin |
| Total SCFAs | 0.47* | 0.22   | -0.50*   | 0.08 | -0.31 | -0.45* | -0.31         | -0.46*            | -0.44*          | -0.48*  | -0.46* |
| Acetate     | 0.45* | 0.20   | -0.51*   | 0.15 | -0.25 | -0.44* | -0.31         | -0.49*            | -0.51*          | -0.49*  | -0.44* |
| Propionate  | 0.56* | 0.37   | -0.40    | 0.09 | -0.22 | -0.22  | -0.10         | -0.50*            | -0.46*          | -0.40   | -0.41  |

\* p<0.05

SCFA, short chain fatty acids; NGN 3, neurogenin 3; SREBP-1c, sterol regulatory element-binding transcription factor 1c; GPBAR1, G-protein-coupled bile acid receptor 1; FAS, fatty acid synthase; CD36 (FAT), fatty acid translocase; LXR, liver X receptor; PPAR $\alpha$ , peroxisome proliferator-activated receptor $\alpha$

Supplementary Table S6. Spearman's rank correlation coefficients for the relationship between parameters related to liver lipid metabolism (A) and ileal L cell function (B).

| (A)                 | PPAR $\alpha$ | LXR    | FAS                 | ACC   | G6PD  | SCD1   | CD36  | PK    | DGAT1 | CPT1   | ACOX  | HMG-CoA reductase |
|---------------------|---------------|--------|---------------------|-------|-------|--------|-------|-------|-------|--------|-------|-------------------|
| SREBP-1c            | 0.42*         | 0.50*  | 0.46*               | 0.15  | -0.02 | 0.17   | 0.42* | 0.05  | 0.30  | -0.16  | 0.39  | 0.30              |
|                     | PPAR $\alpha$ | 0.54*  | 0.39                | 0.56* | -0.16 | 0.34   | 0.34  | 0.57* | 0.45* | 0.06   | 0.88* | 0.33              |
|                     |               | LXR    | 0.27                | 0.32  | 0.09  | 0.35   | 0.32  | 0.44* | 0.76* | -0.45* | 0.46* | -0.00             |
|                     |               |        | FAS                 | 0.20  | -0.03 | 0.41*  | -0.01 | 0.31  | 0.05  | -0.10  | 0.35  | 0.56*             |
|                     |               |        |                     | ACC   | -0.04 | 0.33   | 0.22  | 0.51* | 0.35  | 0.15   | 0.45* | 0.32              |
|                     |               |        |                     |       | G6PD  | -0.15  | 0.17  | 0.29  | -0.04 | -0.26  | -0.04 | 0.18              |
| (B)                 | NGN3          |        |                     |       |       | SCD1   | 0.14  | 0.17  | 0.14  | -0.50* | 0.28  | 0.22              |
| NeuroD              | 0.50*         | NeuroD |                     |       |       |        | CD36  | 0.24  | 0.26  | 0.23   | 0.31  | 0.04              |
| PPAR $\beta/\delta$ | 0.31          | 0.55*  | PPAR $\beta/\delta$ |       |       |        |       | PK    | 0.43* | -0.03  | 0.55* | 0.36              |
| PGCG                | 0.13          | 0.52*  | 0.25                | PGCG  |       |        |       |       | DGAT1 | -0.34  | 0.39  | -0.21             |
| PC1/3               | 0.26          | 0.44*  | 0.56*               | 0.38  | PC1/3 |        |       |       |       | CPT1   | 0.08  | 0.17              |
| GPBAR1              | 0.64*         | 0.45*  | 0.29                | 0.24  | 0.26  | GPBAR1 |       |       |       |        | ACOX  | 0.50*             |
| GPR43               | 0.39          | 0.34   | 0.45*               | 0.24  | 0.29  | 0.55*  |       |       |       |        |       |                   |

SREBP-1c, sterol regulatory element-binding transcription factor-1c; PPAR $\alpha$ , peroxisome proliferator-activated receptor $\alpha$ ; LXR, liver X receptor; FAS, fatty acid synthase; ACC, acetyl-CoA carboxylase; G6PD, glucose 6-phosphate dehydrogenase; SCD1, stearoyl coenzyme A desaturase 1; CD36 (FAT), fatty acid translocase; PK, pyruvate kinase; DGAT1, diacyl glycerol acyl-transferase 1; CPT1, carnitine palmitoyl transferase 1; ACOX, acyl-coenzyme A oxidase; 3-hydroxy-3-methyl-glutaryl-CoA reductase, (HMG-CoA reductase); NeuroD, neurogenic differentiation factor; NGN3, neurogenin 3; PPAR $\beta/\delta$ , peroxisome proliferator-activated receptor $\beta/\delta$ ; PGCG, proglucagon; PC1/3, prohormone convertases1/3; GPBAR1, G-protein-coupled bile acid receptor 1; GPR43, G-protein-coupled receptor 43.
